# Supplementary material for: Molecular mechanism of azithromycin resistance among typhoidal Salmonella strains in Bangladesh identified through passive pediatric surveillance
Source: PLoS Negl Trop Dis. 2019 Nov 15;13(11):e0007868. doi: 10.1371/journal.pntd.0007868 (PMC6881056; doi:10.1371/journal.pntd.0007868)
Supplement: S2 Table — Susceptibility of E. coli strains with empty, Salmonella Typhi AcrB WT/R717Q and Paratyphi A AcrB WT/R717L were tested against a panel of 9 different antibiotic including 5 beta-lactams, 2 fluoroquinolones, 1 phenicol and 1 diaminopyrimidine /sulphonamide. The data are shown as mean and standard error from 3 different biological replicates. (XLSX) [file pntd.0007868.s005.xlsx]

## Sheet: Sheet1
	Empty	Typhi AcrB WT	Typhi AcrB R717Q	Paratyphi AcrB WT	Paratyphi AcrB R717L
Ampicillin	24 ± 1.7	24 ± 1.5	22.7 ± 1.2	21.7 ± 0.3	22.3 ± 1.3
Ceftrixone	32 ± 0.0	33.7 ± 0.9	33.3 ± 0.7	33.3 ± 0.3	33.7 ± 0.3
Ceftazidime	30 ± 0.6	31 ± 0.6	31.3 ± 0.6	30.7 ± 0.7	31.3 ± 0.7
Cefipime	34.7 ± 0.7	36.3 ± 0.9	36 ± 1.0	35.7 ± 0.3	35.7 ± 0.7
Levofloxacin	35 ± 1.0	34.7 ± 0.7	31.3 ± 1.3	31.7 ± 0.3	32.3 ± 0.3
Ciprofloxacin	35.3 ± 1.5	35.7 ± 1.2	35.3 ± 1.3	35 ± 1.5	34.7 ± 0.9
Chloramphenicol	33.7 ± 0.3	31.3 ± 1.3	30.7 ± 1.8	30.7 ± 2.0	31.3 ± 0.9
Co-trimoxazole	30.3 ± 0.3	32 ± 2.6	32 ± 3.1	31 ± 1.7	31.7 ± 3.3
Cefexime	24 ± 0.6	25.5 ± 0.3	24 ± 1.2	24.3 ± 0.3	24 ± 0.6
